# Supplementary material
Source: PubMed Central journal article supplement (PMC5637273)
Supplement: NIHMS909261-supplement-table.pdf [file NIHMS909261-supplement-table.pdf]

| eye ID* | ERG change (microvolts) | Age (months) | Location of tumor                                  | Total OAC cycles | OAC drugs and dose | Additional treatment         | Systemic chemotherapy | RD status at 3 months after first IAC | Complications                                           |
|---------|-------------------------|--------------|----------------------------------------------------|------------------|--------------------|------------------------------|-----------------------|---------------------------------------|---------------------------------------------------------|
| 15      | -15.5                   | 21           | Periphery, nasal                                   | 4                | M5, T1             | No                           | No                    | Persistent                            | Leucopenia Grade 3 x1. Bronchospasm                     |
| 207     | -11.61                  | 15           | Superior retina                                    | 4                | M4, T2, C50        | Laser                        | No                    | Persistent                            | None                                                    |
| 223     | -10.05                  | 15           | Diffusely located, macula-equator and periphery    | 4                | M4, T2, C50        | None                         | No                    | Persistent                            | None                                                    |
| 134     | -8.1                    | 4            | Macula, macula-equator; inferior peripheral retina | 7                | M5, T2, C50        | Bridge Cryo Laser            | Yes (previous)        | Resolved                              | Low ANC x 1 filgrastim                                  |
| 2       | -8                      | 25           | Macula-equator                                     | 6                | M5, C50            | Laser Cryo EBR               | No                    | Persistent                            | Inflam. Reaction<br>Cataract                            |
| 94      | -6.3                    | 6            | Macula                                             | 2                | M2.5               | laser                        | Yes (previous)        | Persistent                            | None                                                    |
| 74      | -5.1                    | 4            | Inferonasal retina                                 | 8                | M2.5, T0.3         | laser plaque.<br>Enucleation | No                    | Persistent                            | ERG little worse,<br>mild swelling<br>ON.lose eyelashes |
| 33      | -4.5                    | 11           | Macula, macula-equator                             | 3                | M3                 | Kenalog                      | No                    | Persistent                            | bronchospasm.<br>Vitreous hemorrhage resolved           |
| 76      | -3.7                    | 20           | Macula, macula-equator, inferior retina            | 3                | C30                | Eventual enucleation         | No                    | Persistent                            | neutropenia Gr 3x2                                      |

|     |       |    |                                                         |   |                 |                           |    |            |                                                         |
|-----|-------|----|---------------------------------------------------------|---|-----------------|---------------------------|----|------------|---------------------------------------------------------|
| 227 | -3.26 | 5  | Macula, macula-equator, inferior peripheral retina      | 3 | M2.5, T1, C40   | None                      | No | Persistent | None                                                    |
| 194 | -1.96 | 8  | Macula-equator, inferior retina                         | 5 | M5, T2, C60     | cryo                      | No | Resolved   | hyperpigmentation rt eyelid mesial.                     |
| 233 | -1.19 | 3  | Macula-equator                                          | 3 | M2.5, C40       | None                      | No | Resolved   | None                                                    |
| 219 | -0.67 | 85 | Macula-equator, optic nerve, inferior retina            | 3 | M5, T2, C60     | IA/InVitr simult          | No | Persistent | SIADH, transient, following balloon-assisted infusion   |
| 6   | 0     | 22 | Macula-equator and periphery                            | 3 | M7.5            | Cryo                      | No | Persistent | None                                                    |
| 16  | 0     | 12 | Periphery, nasal                                        | 5 | M5              | Retinal surgery           | No | Persistent | leucopenia Grade 3 x 1. skin blush                      |
| 162 | 0     | 26 | Macula                                                  | 3 | M7.5, T0.5, C50 | None                      | No | Persistent | None                                                    |
| 165 | 0.07  | 3  | Macula, macula-equator                                  | 3 | M3, T0.4        | IVC then carbo before IAC | No | Persistent | frontal blush                                           |
| 199 | 1.28  | 7  | Optic nerve, macula, macula-equator and inferior retina | 4 | M3, T2          | None                      | No | Resolved   | frontal blush                                           |
| 21  | 1.6   | 31 | Nasal retina                                            | 3 | M5              | Cryo. Laser               | No | Persistent | None                                                    |
| 122 | 2     | 10 | Macula, macula-equator                                  | 3 | M3, T0.3, C25   | none                      | No | Persistent | small vitreous hemorrhage.                              |
| 164 | 2.2   | 14 | Diffusely scattered                                     | 3 | M4, T0.5, C30   | None                      | No | Resolved   | None                                                    |
| 187 | 2.71  | 17 | Optic nerve, inferior retina                            | 5 | M5, T1, C50     | laser                     | No | Persistent | epistaxis to ER. Platelet transfusion x2. frontal blush |
| 216 | 2.75  | 23 | Optic nerve, macula-equator inferior retina             | 2 | M5, T2, C50     | None                      | No | Resolved   | None                                                    |
| 163 | 3     | 16 | Inferonasal retina                                      | 4 | M5, T1, C40     | Laser cryo                | No | Resolved   | None                                                    |

|     |       |    |                                                      |   |               |                     |                |            |                                                      |
|-----|-------|----|------------------------------------------------------|---|---------------|---------------------|----------------|------------|------------------------------------------------------|
| 91  | 3.1   | 13 | Macular equator, inferior retina                     | 2 | M3            | Cryo. Laser         | No             | Persistent | None                                                 |
| 68  | 3.1   | 7  | Macula, macula-equator; inferior retina              | 3 | M3            | None                | No             | Resolved   | small rash. lashes shortening                        |
| 185 | 3.29  | 4  | Macula, macula equator                               | 2 | C30           | IV chemo bridge     | No             | Persistent | None                                                 |
| 132 | 3.9   | 3  | Optic nerve, macula, macula-equator, inferior retina | 1 | M2.5          | Bridge laser        | No             | Resolved   | None                                                 |
| 64  | 4.9   | 16 | Temporal retina                                      | 3 | M4            | None                | No             | Resolved   | Bronchospasm                                         |
| 95  | 6.2   | 20 | Macula-equator                                       | 6 | M5, T0.5, C40 | None                |                | Resolved   | leucopenia Gr3 x2                                    |
| 126 | 6.2   | 11 | Macula                                               | 5 | M4, T.3, C25  | laser               | No             | Resolved   | low ANC                                              |
| 133 | 12.8  | 14 | Macula-equator                                       | 4 | M5, T0.4      | laser               | No             | Persistent | choroid infarction after 3rd procedure               |
| 229 | 15.77 | 5  | Macula-equator                                       | 3 | M3, T1, C40   | IV carbo (bridge)   | No             | Resolved   | low ANC                                              |
| 213 | 18.45 | 29 | Inferonasal retina                                   | 5 | M6, T2, C70   | None                | No             | Resolved   | None                                                 |
| 35  | 19.1  | 6  | Nasal retina                                         | 3 | M2.5          | Laser               | No             | Resolved   | leucopenia Grade 3 x3 (bilateral)                    |
| 49  | 19.5  | 6  | Superior retina                                      | 5 | M4, T0.3      | cryo. Laser. Plaque | No             | Resolved   | inflammatory reaction. loss eye lashes. Bronchospasm |
| 10  | 21    | 10 | Inferior retina                                      | 3 | M5            | None                | No             | Resolved   | Inflammation at 5mg Mel.                             |
| 217 | 21.46 | 5  | Inferotemporal retina                                | 4 | M4, C70       | Laser. IVC          | No             | Resolved   | None                                                 |
| 42  | 22.9  | 6  | Macula, macula equator                               | 2 | M2.5, T0.15   | Laser               | Yes (previous) | Resolved   | None                                                 |

|     |      |    |                                    |   |               |              |                |          |                                                                                             |
|-----|------|----|------------------------------------|---|---------------|--------------|----------------|----------|---------------------------------------------------------------------------------------------|
| 160 | 24.5 | 9  | Inferior and superior nasal retina | 2 | M3, T0.3, C30 | laser        | No             | Resolved | retinal microhemorrhages post procedure. Also: right leg petechia. Large choroid infarction |
| 127 | 24.9 | 7  | Macula                             | 3 | M4, T0.3      | cryo         | No             | Resolved | frontal rash inflammatory reaction ptosis.                                                  |
| 147 | 28.6 | 13 | Macula-equator                     | 4 | M4, T0.3, C30 | none         | No             | Resolved | 6th nerve palsy on exam May2012, OK in June 2013                                            |
| 125 | 34.4 | 11 | Macula                             | 6 | M4, T0.4, C30 | Cryo Laser   | No             | Resolved | Low ANC                                                                                     |
| 84  | 37.9 | 13 | Superior retina                    | 3 | M3, T0.3      | Laser        | Yes (previous) | Resolved | Leucopenia Gr 3x1 and Gr 4 x1                                                               |
| 39  | 40.7 | 39 | Inferior and nasal retina          | 6 | M4, T0.4, C30 | Cryo. Plaque | No             | Resolved | Loss of eyelashes. Bronchospasm                                                             |
| 71  | 46.6 | 12 | Inferior retina                    | 3 | M4            | None         | No             | Resolved | None                                                                                        |
| 112 | 52.1 | 4  | Macula, macula equator             | 4 | M3, T0.5      | cryo         | No             | Resolved | Skin red mark                                                                               |
| 149 | 69.1 | 11 | Macula-equator, inferior retina    | 4 | M3, T0.3, C40 | laser        | No             | Resolved | None                                                                                        |
| 58  | 78.6 | 8  | Macula, macula equator             | 3 | M2.5          | laser. Cryo  | Yes (previous) | Resolved | Leucopenia Gr4 x1 and Gr 3x1. mild bronchospasm                                             |

Abbreviations: M - Melphalan; T - Topotecan; C - carboplatin (all doses in mg)

\* Eye IDs displayed here do NOT correspond to patient IDs assigned in Figure 1.

ERG change is shown at three months.
